# Supplementary material
Source: MDPI journal article supplement (https://www.mdpi.com/2304-6740/10/12/218)
Supplement: s1 [file s1]

*Supporting Information*

# **Fabrication of Sulfur-Doped Reduced Graphene Oxide Modified Glassy Carbon Electrode (S@rGO/GCE) Based Acetaminophen Sensor**

**Mohd Quasim Khan <sup>1,†</sup>, Praveen Kumar <sup>2</sup>, Rais Ahmad Khan <sup>3</sup>, Khursheed Ahmad <sup>4,†</sup> and Haekyoung Kim <sup>4,\*</sup>**

<sup>1</sup> Department of Chemistry, M.M.D.C, Moradabad, M.J.P. Rohilkhand University, Bareilly 244001, U.P., India

<sup>2</sup> Department of Chemistry, Indian Institute of Technology Indore, Khandwa Road, Simrol 453552, M.P., India

<sup>3</sup> Department of Chemistry, College of Science, King Saud University, Riyadh 11451, Saudi Arabia

<sup>4</sup> School of Materials Science and Engineering, Yeungnam University, Gyeongsan 38541, Republic of Korea

\* Correspondence: hkkim@ynu.ac.kr

† These authors contributed equally to this work.

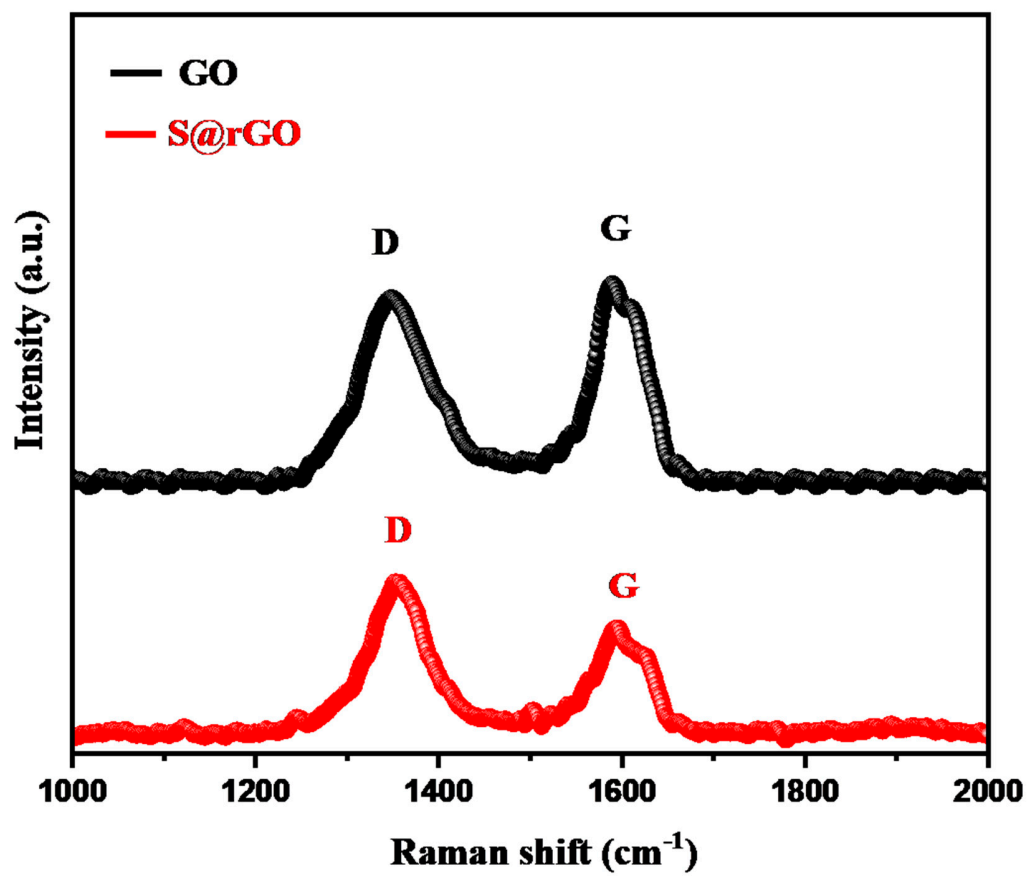

Figure S1. Raman spectrum of GO and S@rGO.

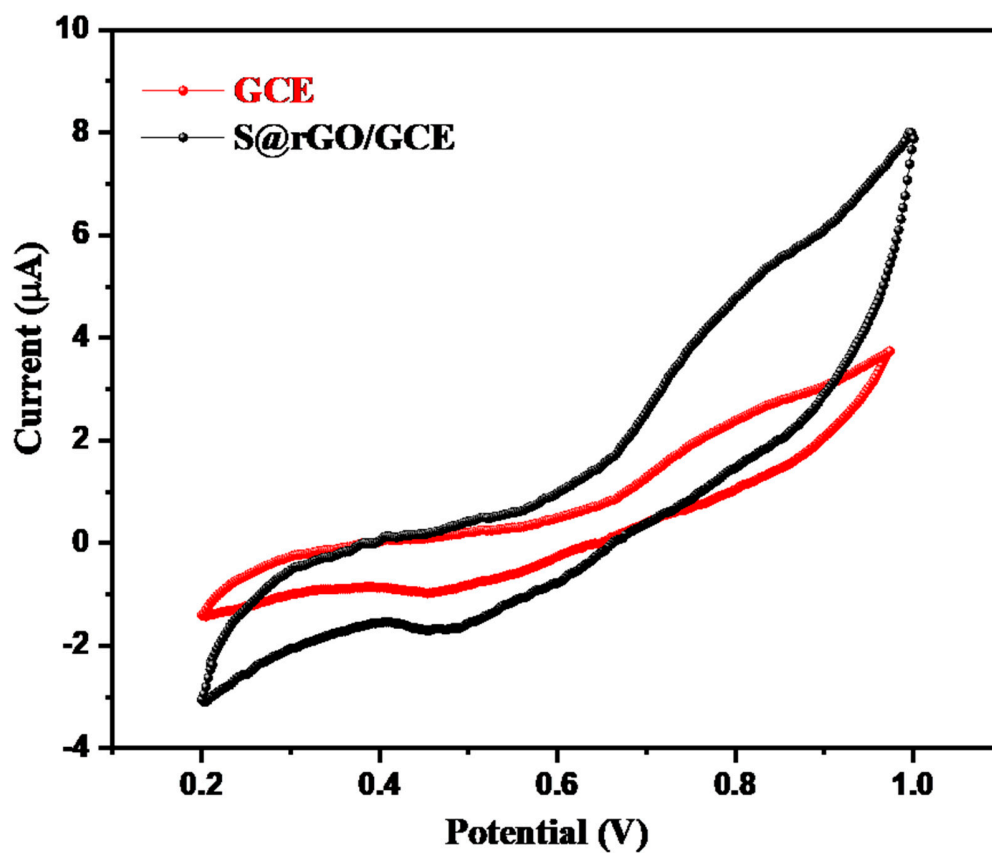

Figure S2. CV patterns of GCE and S@rGO/GCE in 0.1 M PBS (pH = 7.0; scan rate = 50 mV/s).

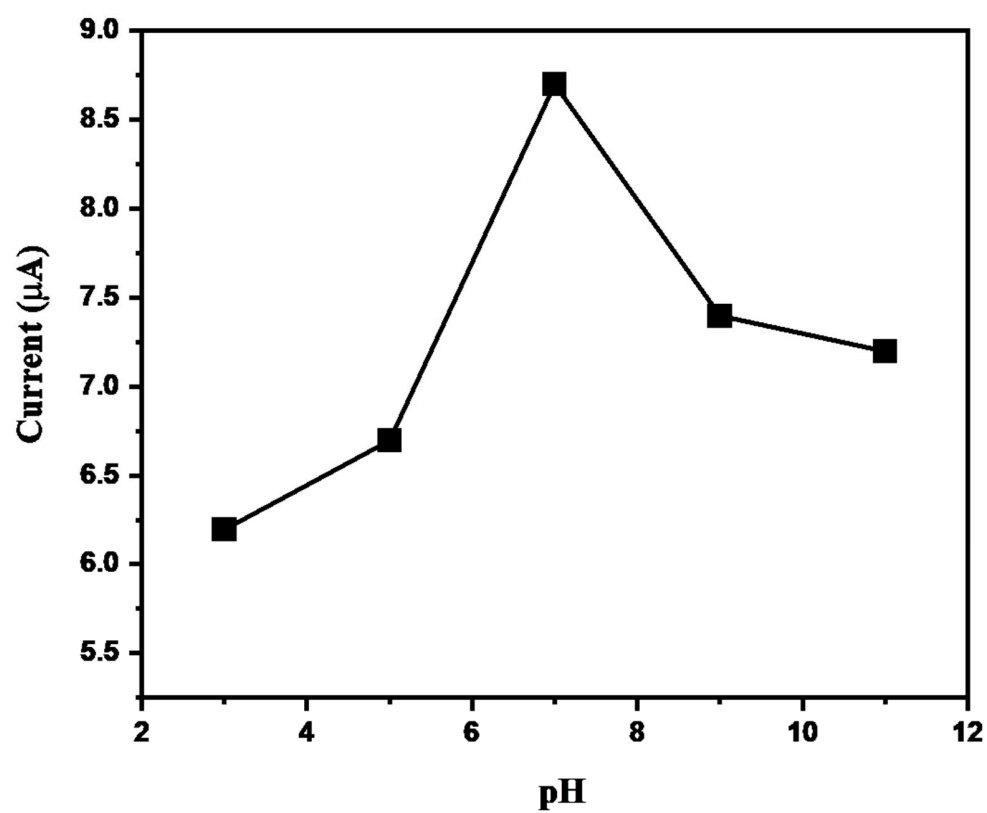

**Figure S3.** Current response (using CV) of the S@rGO/GCE in the presence of 91  $\mu\text{M}$  acetaminophen in 0.1 M PBS of different pH (3, 5, 7, 9 and 11) at applied scan rate of 50 mV/s.

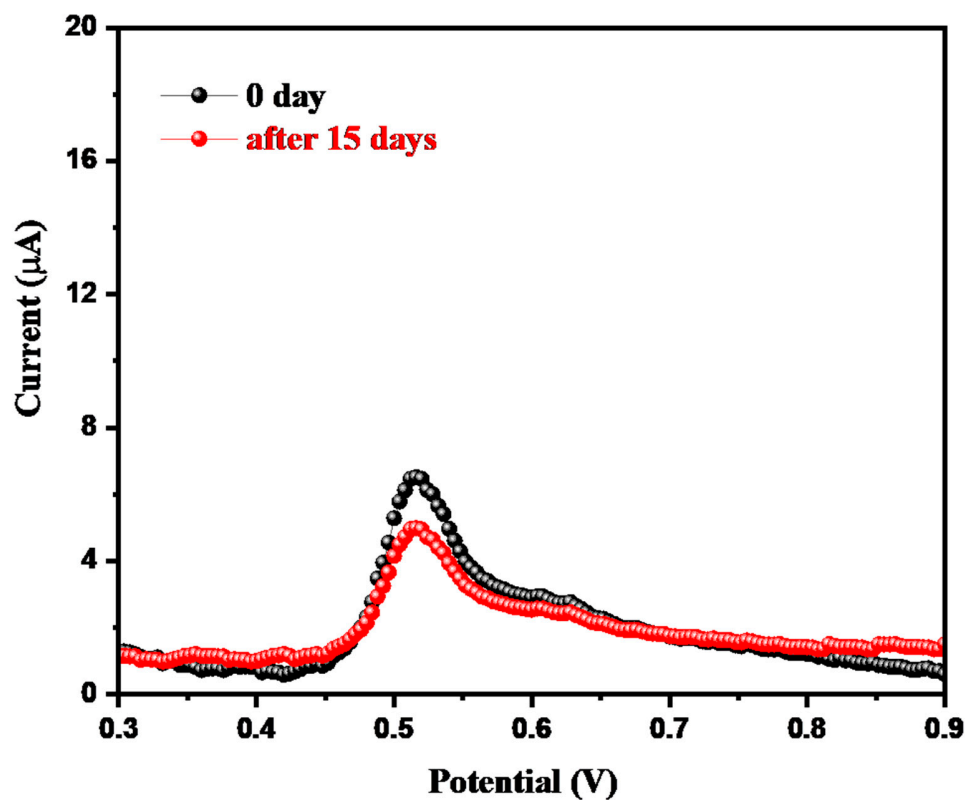

**Figure S4.** DPV response of the S@rGO/GCE (0 day and after 15 day) in presence of 100  $\mu\text{M}$  acetaminophen in 0.1 M PBS (pH = 7.0) at applied scan rate of 50 mV/s.
